# Supplementary material for: Exome and Transcriptome Sequencing of Aedes aegypti Identifies a Locus That Confers Resistance to Brugia malayi and Alters the Immune Response
Source: PubMed Central journal article supplement (PMC4376896; doi:10.1371/journal.ppat.1004765), 2015-03-27

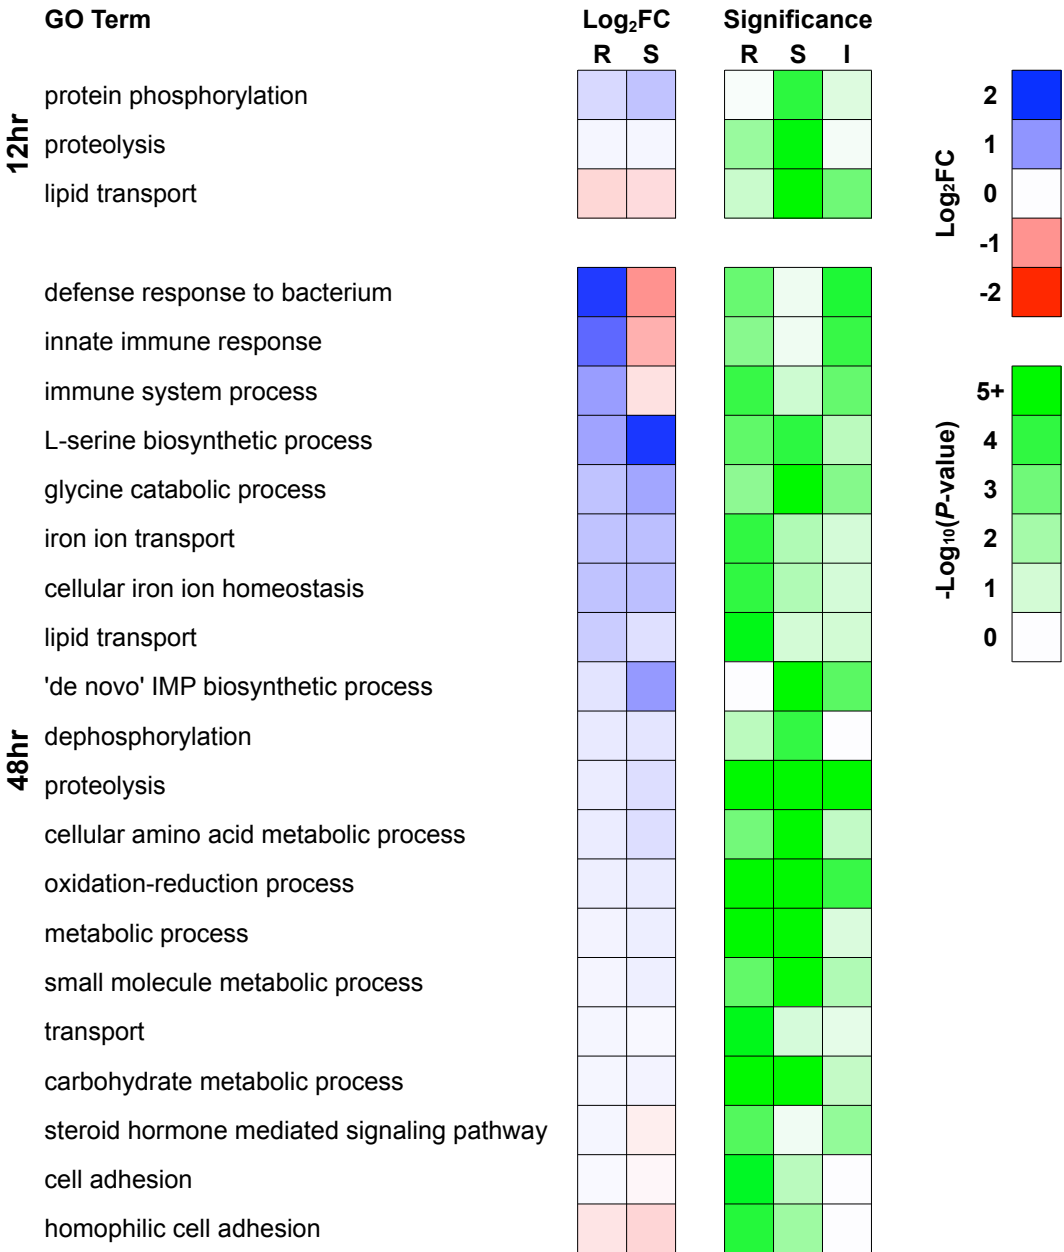

Supplement: ppat.1004765.s004.pdf [file ppat.1004765.s004.pdf]
