# Supplementary material for: Exome and Transcriptome Sequencing of Aedes aegypti Identifies a Locus That Confers Resistance to Brugia malayi and Alters the Immune Response
Source: PubMed Central journal article supplement (PMC4376896; doi:10.1371/journal.ppat.1004765), 2015-03-27
Supplement: ppat.1004765.s008.pdf [file ppat.1004765.s008.pdf]

**Table S1. Genome and exome sequencing design.**

| Lane # | Individuals                                                                                                                                                                                | Library Type | Target       | Sequencing              |
|--------|--------------------------------------------------------------------------------------------------------------------------------------------------------------------------------------------|--------------|--------------|-------------------------|
| 1      | <i>169R 171S 172S 174S</i><br><i>180R 181R 186R 187R</i><br><i>189S 190S 194S 195R</i><br><i>199R 201R 210R 211R</i><br><i>215S 220S 221R 222S</i><br><i>226S</i><br>(n=21)                | Nextera      | Whole genome | 100bp PE HiSeq (KAUST)  |
| 2      | <i>169R 171S 172S 174S</i><br><i>180R 181R 186R 187R</i><br><i>189S 190S 194S 195R</i><br><i>199R 201R 210R 211R</i><br><i>215S 220S 221R 222S</i><br><i>226S</i><br>(n=21)                | Nextera      | Whole genome | 100bp PE HiSeq (KAUST)  |
| 3      | <i>21R 22R 24S 27R 30S 35R</i><br><i>44S 45R 49S 52R 60R 61S</i><br><i>67S 71R 90S 91S 124S</i><br><i>269S 350R 370R 374R</i><br><i>385S 386R 408R</i><br>(n=24)                           | Nextera      | Whole genome | 100bp PE HiSeq (KAUST)  |
| 4      | <i>20S 23S 31R 36S 66S 74R</i><br><i>76R 77S 87R 89R 119S</i><br><i>127R 147S 152R 198R</i><br><i>219R 225S 227R 278R</i><br><i>348S 359R 361R 362S</i><br><i>381S 400S</i><br>(n=25)      | Nextera      | Whole genome | 100bp PE HiSeq (KAUST)  |
| 5      | <i>93S 97S 99S 102R 103R</i><br><i>104R 105R 112R 370R</i><br><i>371S 372S 377S 379R</i><br><i>380R 381S 382S 383R</i><br><i>387R 398R 399S 405S</i><br><i>406R 409R 411S</i><br>(n=24)    | TruSeq       | Exome        | 150bp PE MiSeq (Oxford) |
| 6      | <i>94S 96R 98S 100R 106R</i><br><i>213R 216S 218S 233R</i><br><i>235S 236S 240R 256R</i><br><i>259R 260S 261S 301R</i><br><i>313S 315R 316S 324S</i><br><i>326R 384S 391R</i><br>(n=24)    | TruSeq       | Exome        | 100bp PE HiSeq (Oxford) |
| 7      | <i>101S 107S 108S 110S</i><br><i>113R 114R 166S 167R</i><br><i>196R 197S 200S 212R</i><br><i>271S 281S 283R 288R</i><br><i>292S 298R 299R 303R</i><br><i>307R 308S 311S 314R</i><br>(n=24) | TruSeq       | Exome        | 100bp PE HiSeq (Oxford) |

Individuals in italics were sequenced twice.
