# Supplementary material for: Exome and Transcriptome Sequencing of Aedes aegypti Identifies a Locus That Confers Resistance to Brugia malayi and Alters the Immune Response
Source: PubMed Central journal article supplement (PMC4376896; doi:10.1371/journal.ppat.1004765), 2015-03-27
Supplement: ppat.1004765.s009.pdf [file ppat.1004765.s009.pdf]

**Table S2. RNA sequencing design.** Libraries were named by time point, mosquito genotype, infection status (if applicable), and cage number. The # of reads obtained refers to the numbers of reads post-quality trimming.

| <b>Lane #</b> | <b>Libraries</b>   | <b># of Reads Obtained</b> |
|---------------|--------------------|----------------------------|
| 1             | 48hr-S-Brugia-C1   | 36,180,742                 |
|               | 48hr-R-Brugia-C2   | 32,883,742                 |
|               | 48hr-S-Control-C3  | 33,478,626                 |
|               | 48hr-R-Control-C4  | 42,715,370                 |
|               | 48hr-S-Brugia-C5   | 51,356,958                 |
|               | 48hr-R-Brugia-C6   | 36,339,868                 |
|               | 48hr-S-Control-C7  | 58,400,516                 |
|               | 48hr-R-Control-C8  | 41,325,686                 |
|               | 0hr-S-C5           | 48,537,302                 |
| 0hr-R-C6      | 34,887,180         |                            |
| 2             | 48hr-S-Brugia-C9   | 41,106,956                 |
|               | 48hr-R-Brugia-C10  | 32,388,940                 |
|               | 48hr-S-Control-C11 | 58,865,542                 |
|               | 48hr-R-Control-C12 | 31,697,882                 |
|               | 48hr-S-Brugia-C13  | 37,819,770                 |
|               | 48hr-R-Brugia-C14  | 40,384,214                 |
|               | 48hr-S-Control-C15 | 42,983,224                 |
|               | 48hr-R-Control-C16 | 41,957,676                 |
| 0hr-S-C7      | 29,884,246         |                            |
| 3             | 12hr-S-Brugia-C1   | 56,807,888                 |
|               | 12hr-R-Brugia-C2*  | 36,637,808                 |
|               | 12hr-S-Control-C3  | 36,380,274                 |
|               | 12hr-R-Control-C4  | 45,763,976                 |
|               | 12hr-S-Brugia-C5   | 33,957,732                 |
|               | 12hr-R-Brugia-C6   | 38,347,362                 |
|               | 12hr-S-Control-C7  | 36,144,138                 |
|               | 0hr-S-C1           | 45,432,462                 |
| 0hr-R-C2      | 76,500,644         |                            |
| 4             | 12hr-S-Brugia-C9*  | 23,721,280                 |
|               | 12hr-R-Brugia-C10* | 28,026,154                 |
|               | 12hr-S-Control-C11 | 49,146,766                 |
|               | 12hr-R-Control-C12 | 43,920,258                 |
|               | 12hr-S-Brugia-C13* | 40,488,014                 |
|               | 12hr-R-Brugia-C14  | 40,028,056                 |
|               | 12hr-R-Control-C16 | 47,825,728                 |
|               | 0hr-R-C4           | 70,624,632                 |

\*These libraries were excluded from the final analysis.
