# Supplementary material for: Exome and Transcriptome Sequencing of Aedes aegypti Identifies a Locus That Confers Resistance to Brugia malayi and Alters the Immune Response
Source: PubMed Central journal article supplement (PMC4376896; doi:10.1371/journal.ppat.1004765), 2015-03-27
Supplement: ppat.1004765.s010.pdf [file ppat.1004765.s010.pdf]

**Table S3. Biological coefficients of variation (BCV) for RNA-seq experiment.**

|                        | <b>BCV</b>   | <b># of Genes</b> |
|------------------------|--------------|-------------------|
| <b>1) Treatment</b>    |              |                   |
| 12hr, S                | 0.455/0.353  | 12,255/12,559     |
| 12hr, R                | 0.409/0.301  | 12,292/12,549     |
| 48hr, S                | 0.230        | 12,944            |
| 48hr, R                | 0.179        | 13,137            |
| <b>2) Constitutive</b> |              |                   |
| 0hr                    | 0.187        | 13,121            |
| <b>3) Interaction</b>  |              |                   |
| 12hr                   | 0.3058/0.232 | 12,945/13,156     |
| 48hr                   | 0.161        | 13,594            |

12hr values are shown before/after removal of low quality RNA-seq libraries.
